# Supplementary material
Source: PubMed Central journal article supplement (PMC5358521)
Supplement: jciinsight-2-89206-s001.pdf [file jciinsight-2-89206-s001.pdf]

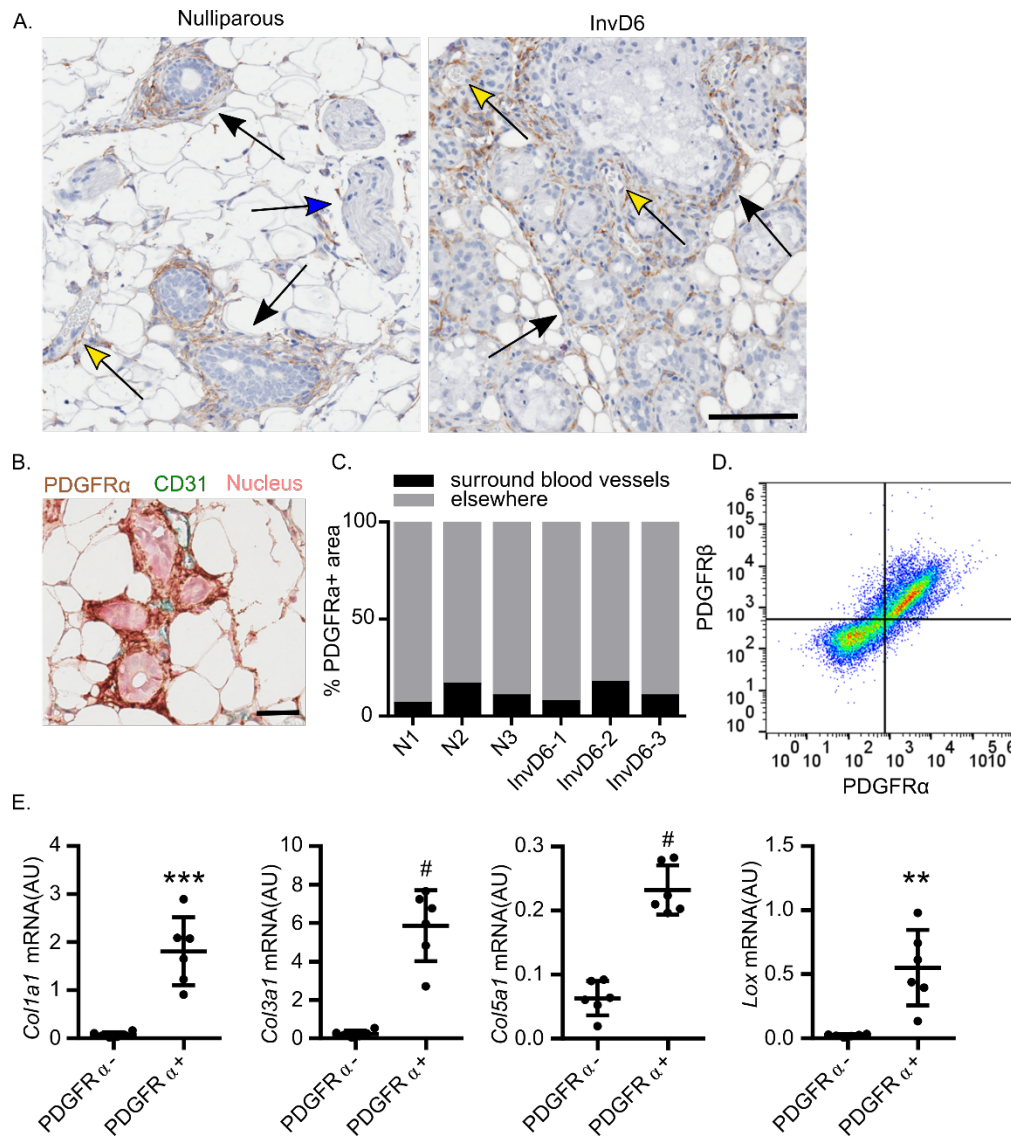

**Supplemental figure 1.** PDGFRα is expressed dominantly by stromal cells surrounding mammary ducts and alveoli. **A)** IHC staining of PDGFRα in nulliparous (left panel) and InvD6 mouse mammary glands (right panel). Black arrows: mammary ductal and alveolar structures; blue arrow: muscle; yellow arrows: blood vessel. **B)** Co-staining for PDGFRα (brown) and CD31 (green) in nulliparous Balb/c mammary gland shows lack of dual positive cells. Counterstain: pink. Scale bar: 30 μm. **C)** Quantification of PDGFRα positive area surround CD31<sup>+</sup> blood vessels (black) or elsewhere (gray) in three mammary glands from nulliparous mice (N 1-3) and three InvD6 mammary glands (InvD6 1-3). **D)** Flow cytometry for PDGFRα and PDGFRβ in nulliparous mouse mammary glands reveals significant dual positivity. **E)** RT-qPCR for *Col1a1*, *Col3a1*, *Col5a1* and *LOX* gene expression in sorted PDGFRα<sup>+</sup> and PDGFRα<sup>-</sup> cells. N=6. Scale bar: 100 μm. \*\*P<0.01, \*\*\*P<0.001, #P<0.0001.

A.

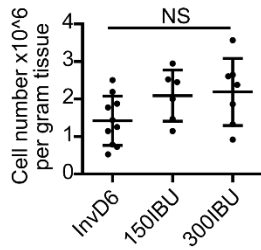

B.

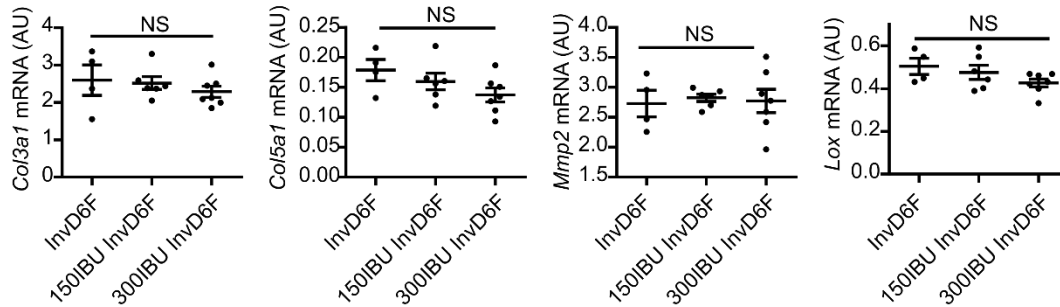

**Supplemental figure 2.** Effects of ibuprofen treatment on PDGFR $\alpha$ <sup>+</sup> cells in the InvD6 mammary gland. **A)** PDGFR $\alpha$ <sup>+</sup> cell number per gram mammary gland tissue quantitated by FACS analysis, in the absence or presence of two doses of ibuprofen treatment (150IBU:150 mg/kg and 300IBU: 300 mg/kg Ibuprofen in diet) for 6 days following weaning. N=6. **B)** RT-qPCR of *Col3a1*, *Col5a1*, *Lox* and *MMP2* gene expression in InvD6 fibroblasts in the absence or presence of ibuprofen. N=4-7. NS: not significant.

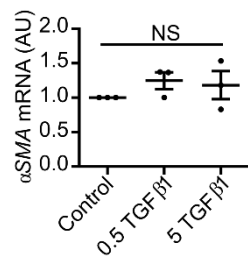

**Supplemental figure 3.** TGF $\beta$ 1 does not induce fibroblast  $\alpha$ SMA expression in floating collagen cultures. RT-qPCR of  $\alpha$ SMA in primary mammary fibroblasts without (Control) or with the treatment of 0.5 ng/ml TGF $\beta$ 1 (0.5 TGF $\beta$ 1) and 5 ng/ml TGF $\beta$ 1 (5 TGF $\beta$ 1). N=3. NS: not significant.

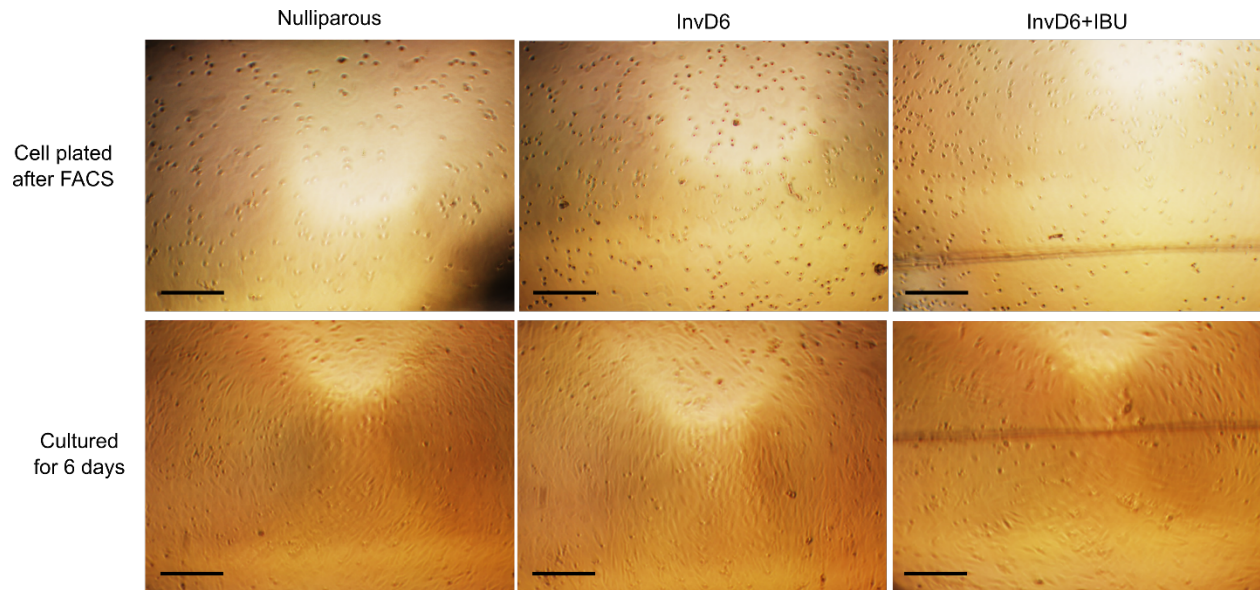

**Supplemental figure 4.** Fibroblast ex vivo adhesion and cell culture survival are independent of reproductive state. Top panel: Sorted PDGFR $\alpha$ <sup>+</sup> mammary fibroblasts used in the D2A1 tumor cell co-injection experiments and plated at equal concentration. Bottom panel: cells in the top panel after 6 days of culture. Scale bar: 100  $\mu$ m.

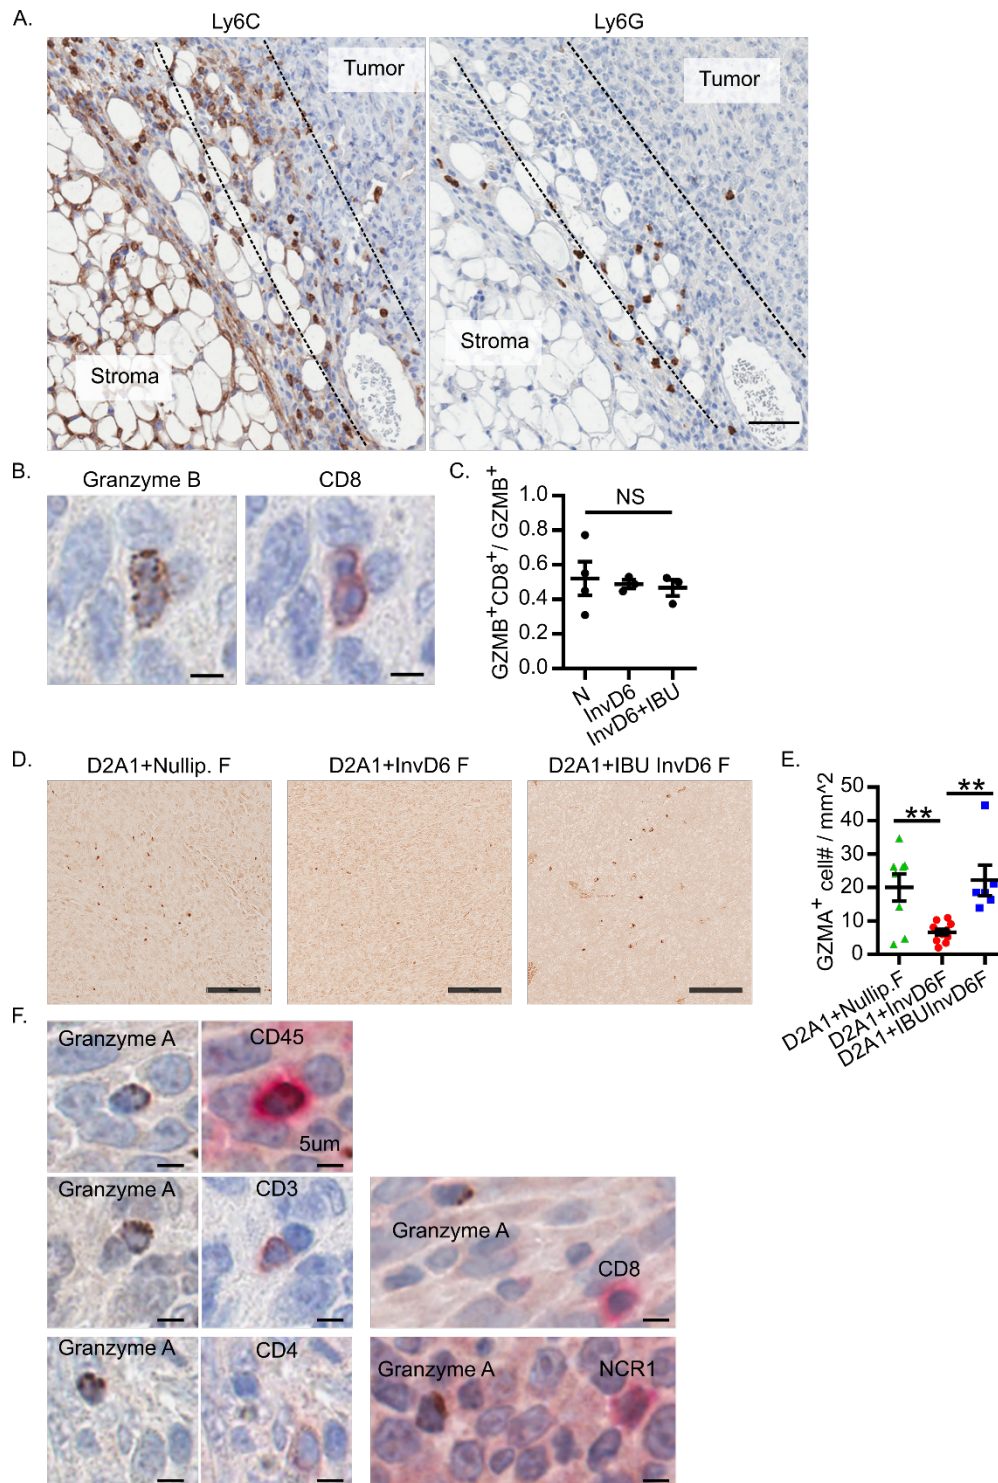

**Supplemental figure 5.** Immunohistochemical characterization of tumor infiltrating immune cells. **A)** Ly6C and Ly6G staining in serial sections of representative D2A1+ InvD6 F tumor. Dashed lines show tumor border. Scale bar: 50  $\mu\text{m}$ . **B)** IHC staining of granzyme B (left panel) and CD8 (right panel) of the same tumor section. **C)** Quantification the percentage of granzyme B<sup>+</sup> cells that are CD8<sup>+</sup>. **D)** Representative images of granzyme A<sup>+</sup> cells within tumors from each

group. Scale bar: 100  $\mu\text{m}$ . **E)** Quantification of IHC staining for intratumoral granzyme A<sup>+</sup> cells by group. **F)** IHC co-staining for granzyme A and immune cell markers CD45, CD3, CD8, CD4, and NCR1, as indicated by labels. Scale bar: 5  $\mu\text{m}$ .

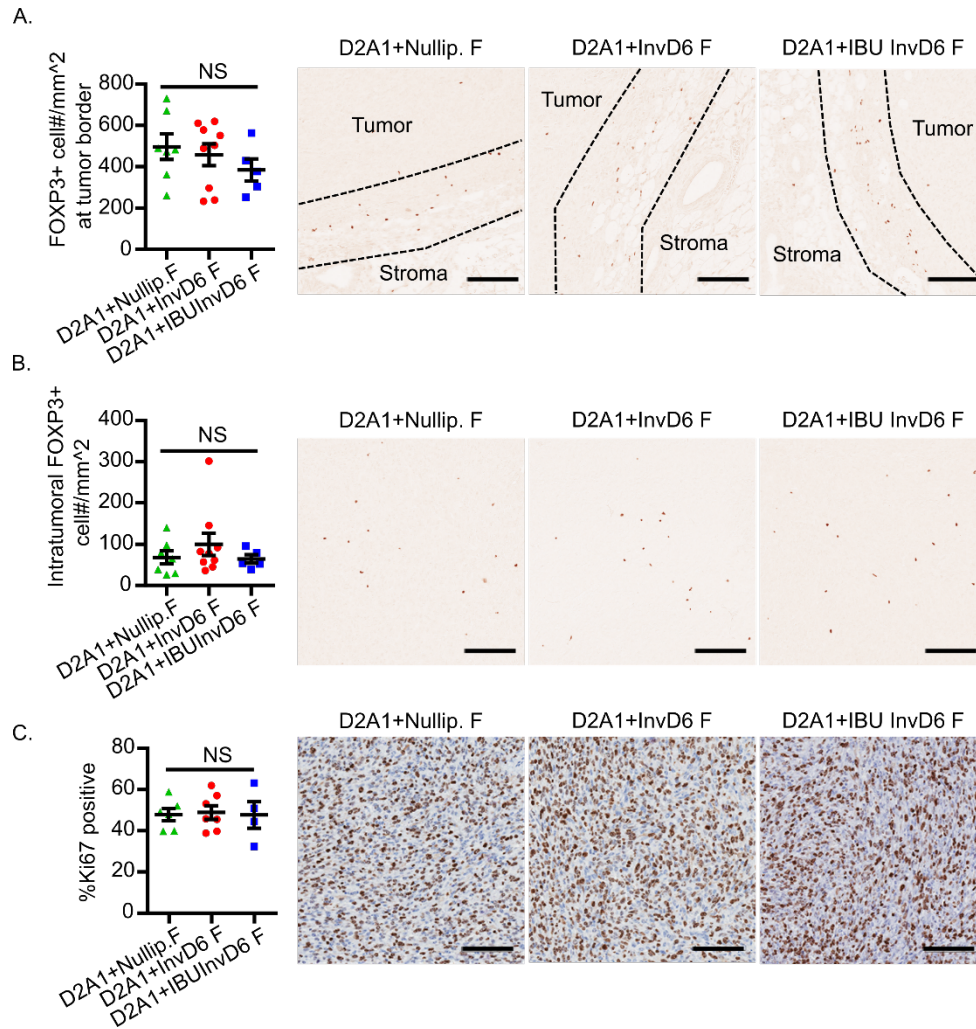

**Supplemental figure 6.** FOXP3 and Ki67 IHC tumor analyses demonstrate no differences between fibroblast groups. **A)** Left panel: Quantification of FOXP3<sup>+</sup> cells at the tumor border. Right Panel: representative images of FOXP3<sup>+</sup> cells at the tumor border. Scale bar: 100 µm. **B)** Left panel: Quantification of intratumoral FOXP3<sup>+</sup> cells. Right Panel: representative images of intratumoral FOXP3<sup>+</sup> cells. Scale bar: 100 µm. Counterstaining is not shown in A) and B) to enhance visualization of positive cells. **C)** Left panel: Quantification of Ki67<sup>+</sup> cells in tumor. Right Panel: representative images of Ki67<sup>+</sup> cells. Scale bar: 20 µm.

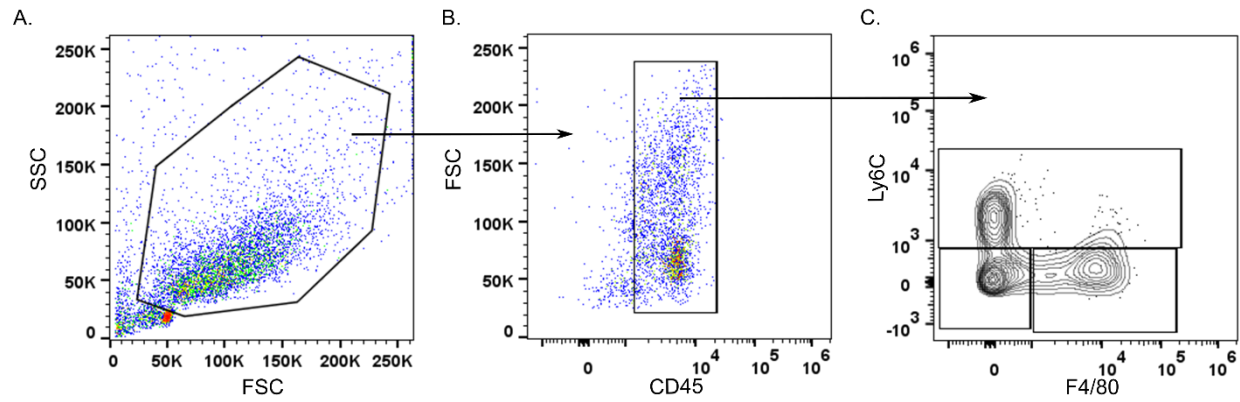

**Supplemental figure 7.** Characterization of monocyte derived cells by flow cytometry. **A)** Cells are gated by forward scatter and side scatter. **B)** Immune cells are further gated by CD45 and forward scatter. **C)** CD45<sup>+</sup> cells are further gated by F4/80 and Ly6C. Three populations are indicated. Monocyte: Ly6C<sup>+</sup>F4/80<sup>-</sup>. Macrophages: Ly6C<sup>-</sup>F4/80<sup>+</sup>. Immature myeloid progenitor cells: Ly6C<sup>-</sup>F4/80<sup>-</sup>

## **Supplemental method**

**Immunohistochemistry.** 4  $\mu$ m sections of formalin-fixed, paraffin-embedded mouse mammary glands were used for IHC. Slides were pretreated with Target Retrieval Solution (Dako S1699 or DAKO S2367). Then, slides were treated with 3% H<sub>2</sub>O<sub>2</sub> in Methanol for 10 minutes, followed by protein block (Dako, X0909) for 1 hour. Primary and secondary antibody information are as follows:

| Targets        | Primary Antibody vendor and catalog # | Dilution | Secondary antibody vendor and catalog # | Dilution | Chromogen and color        |
|----------------|---------------------------------------|----------|-----------------------------------------|----------|----------------------------|
| PDGFR $\alpha$ | R&D, AF1062                           | 1:300    | Santa Cruz, SC2922                      | 1:100    | DAKO, K3468, brown         |
| CD31           | Abcam, ab28364                        | 1:100    | ThermoFisher, 31461                     | 1:100    | Bio SB, BSB0129, green     |
| Ly6G           | BD Biosciences, 551459                | 1:1000   | Biocare, RT517H                         | N/A      | DAKO, K3468, brown         |
| Granzyme A     | Santa Cruz, SC5515                    | 1:100    | Santa Cruz, SC2922                      | 1:100    | DAKO, K3468, brown         |
| CD45           | BD pharmingen, 550539                 | 1:400    | Santa cruz, SC2021                      | 1:100    | Biocare, WR806, red        |
| CD3            | Abcam ab16669                         | 1:100    | Histofine, Simple Stain, anti-rabbit    | N/A      | Vector, SK-4200, brick red |
| CD4            | eBioscience, 14-9766-82               | 1:100    | Histofine, Simple Stain, anti-rat       | N/A      | Vector, SK-4200, brick red |
| NCR1           | Abcam ab199128                        | 1:50     | Histofine, Simple Stain, anti-rabbit    | N/A      | Biocare, WR806, red        |
| FOXP3          | eBioscience, 14-5773-82               | 1:100    | Biocare, RT517H                         | N/A      | DAKO, K3468, brown         |
| Ki67           | Neo-markers, RM9106s                  | 1:100    | ThermoFisher, 31461                     | 1:100    | DAKO, K3468, brown         |

All primary antibodies were incubated for 1 hour at room temperature, and secondary antibodies were incubated for 30 minutes in room temperature. For dual co-staining slides, three methods were used based on the primary antibodies combination. Method-1: a combination of DAB (DAKO K3468, brown) with Warp Red (Biocare, WR806, red). Method-2: a combination of DAB (DAKO K3468, brown) with PolyDetector HRP Green kit (Bio SB, BSB0129, green). Method-3: AEC (Vector SK-4200) was used with antigen retrieval (BioGenex HK086) between each staining targets. For PDGFR $\alpha$  and CD31 dual staining, tissues were counterstained with Nuclear Fast Red (American MasterTech, STNFRPT) for 1 minutes. For other staining, tissues were counterstained with hematoxylin (DAKO, S3301) for 6 minutes.

**Flow cytometry.** 1x10<sup>6</sup> cells per sample were blocked with CD16/32 (eBioscience, 14-0161-81) for 30 minutes and cell surface markers were stained for 20 minutes. PDGFR $\alpha$  (BioLegend, 135910): 1:100 dilution, PDGFR $\beta$  (BioLegend, 136007): 1:100 dilution, CD45 (eBioscience, 25-0451-82): 1:800 dilution, Ly6C (BioLegend, 128012): 1:400 dilution, F4/80 (BioLegend, 123108): 1:200 dilution. Cells were stained for 20 minutes. Experiments were performed on an

LSRFortessa (BD Biosciences; Oregon Health and Science University Flow Cytometry Shared Resource) and analysis was performed using FlowJo (FlowJo, LLC Data Analysis Software, Ashland, OR).
